# Supplementary material for: Comparing race, gender, age, and career categories in recognizing and grouping tasks
Source: PeerJ. 2020 May 15;8:e9156. doi: 10.7717/peerj.9156 (PMC7233271; doi:10.7717/peerj.9156)
Supplement: Data S2 — The number refer to the frequency of clarify the target photograph with test photograph together as one group in the categorization task. [file peerj-08-9156-s002.xls]

## Sheet: raw
id	Age	hukou	Sex	a1	a2	a3	a4	a5	a6	a7	a8	a9	a10	a11	a12	aa1	aa2	aa3	aa4	aa5	aa6	aa7	aa8	aa9	aa10	aa11	aa12	b1	b2	b3	b4	b5	b6	b7	b8	b9	b10	b11	b12	bb1	bb2	bb3	bb4	bb5	bb6	bb7	bb8	bb9	bb10
1	18	rural	male	b	a	a	b	a	a	a	a	a	b	a	a	b	a	a	b	a	a	a	a	a	a	a	a	a	a	a	b	a	a	b	a	a	a	a	a	b	a	a	a	a	a	b	a	b	a
2	18	urban	male	b	a	a	b	a	a	b	a	a	a	a	a	b	a	a	b	a	a	b	b	a	a	a	a	b	a	a	b	a	a	a	b	a	a	a	a	b	a	a	b	a	a	b	a	a	a
3	22	rural	female	a	a	a	a	a	b	a	a	b	a	b	b	a	a	b	a	a	a	a	a	b	a	a	b	a	a	a	b	a	a	a	a	b	b	a	b	b	b	a	b	a	a	a	a	b	b
4	20	rural	female	b	b	b	b	b	a	b	a	a	a	a	a	b	b	b	b	a	a	b	a	a	a	a	a	b	b	b	b	a	a	b	a	a	b	a	a	b	b	a	b	a	a	a	a	a	b
5	19	urban	female	b	a	a	b	a	a	a	a	b	a	a	b	b	a	a	b	a	a	a	a	b	a	a	b	b	a	a	b	a	a	a	a	b	a	a	b	b	a	a	b	a	a	a	a	b	a
6	18	rural	male	a	a	a	b	a	a	a	a	b	a	a	b	b	a	a	b	a	a	a	a	b	a	a	b	b	a	a	b	a	a	a	a	b	a	a	b	a	a	a	a	a	a	a	a	b	b
7	18	urban	male	a	a	a	a	a	b	a	a	b	a	b	b	a	a	a	a	a	b	a	a	b	a	a	b	a	a	a	a	a	b	a	a	b	a	b	b	a	a	a	a	a	b	a	a	b	a
8	18	urban	male	b	a	a	a	a	a	a	a	b	a	a	a	b	a	a	b	a	a	a	a	b	a	a	b	b	a	a	b	a	a	a	a	b	a	a	b	b	a	a	a	a	b	a	a	a	a
9	17	rural	female	a	b	b	b	b	a	b	b	a	a	b	a	b	b	b	a	b	a	a	a	a	a	a	a	b	a	a	b	a	a	a	a	a	a	a	a	b	b	a	b	a	a	b	a	a	a
10	18	rural	female	a	a	b	b	a	a	a	a	b	a	a	b	b	a	a	b	a	b	a	a	b	a	a	b	b	a	b	b	a	b	a	a	b	a	a	b	b	a	b	b	a	b	a	a	b	a
11	19	rural	male	b	a	a	a	a	a	a	a	a	a	a	a	b	a	a	a	a	a	a	a	a	a	a	a	b	a	a	a	a	a	a	a	a	a	a	a	b	a	a	a	a	a	a	a	a	a
12	18	rural	male	a	a	a	a	a	b	a	a	b	a	b	b	a	a	a	a	a	b	a	a	b	a	b	b	a	a	a	b	a	b	a	a	b	a	b	b	a	a	a	a	a	b	b	a	b	a
13	18	urban	male	b	a	a	b	a	a	a	a	b	a	a	a	b	a	a	b	a	a	a	a	b	a	a	b	a	a	a	a	a	a	a	a	a	a	a	a	b	a	a	b	a	a	a	a	b	a
14	18	rural	female	b	a	b	a	a	a	a	a	b	a	a	b	b	a	b	b	a	a	a	a	b	a	a	b	b	a	a	b	a	a	a	a	a	a	a	b	b	a	b	b	a	a	a	b	a	b
15	18	rural	male	a	a	b	a	a	b	a	a	b	b	b	b	a	a	b	a	a	b	a	a	b	b	b	b	a	a	a	a	a	b	a	a	b	b	b	b	a	a	b	a	a	b	a	a	b	b
16	19	rural	male	b	b	b	b	a	b	b	a	b	b	a	a	a	a	a	b	b	a	a	a	b	b	b	b	b	b	a	b	a	a	b	a	a	b	b	b	b	b	a	b	a	b	a	b	a	b
17	18	urban	female	a	a	a	b	a	a	b	a	a	a	a	a	b	a	a	b	b	a	a	a	a	a	a	a	b	a	a	b	a	a	a	a	a	a	a	a	b	a	a	b	a	a	b	a	a	a
18	17	urban	female	a	b	a	b	b	a	b	b	a	a	b	b	a	a	a	a	a	a	b	a	a	a	a	b	a	a	a	b	a	a	b	b	a	b	a	a	b	b	a	b	a	a	b	b	b	a
19	18	rural	male	a	a	a	a	a	a	a	b	a	a	a	a	a	a	a	a	a	a	b	b	a	a	a	a	a	a	a	a	b	a	a	a	a	a	a	a	a	a	a	a	a	a	a	b	b	a
20	18	urban	female	a	a	a	b	a	a	a	a	b	a	a	b	b	a	a	b	a	a	a	a	b	a	a	b	a	a	a	b	a	a	a	a	b	a	a	b	a	a	a	a	a	a	a	a	b	a
21	18	rural	female	b	a	a	b	a	a	b	a	b	a	a	a	b	b	a	b	a	a	b	a	b	a	a	b	b	a	a	a	a	a	a	a	a	a	a	a	a	a	a	a	a	a	a	a	a	a
22	18	urban	male	b	a	b	b	a	b	a	a	b	a	a	b	b	a	b	b	a	a	a	a	b	b	b	b	b	a	b	b	a	a	a	a	b	b	a	b	b	a	b	b	a	a	a	a	b	b
23	18	rural	male	a	a	a	a	a	a	a	a	b	a	a	b	a	a	b	a	a	b	a	a	b	a	a	b	a	a	b	a	a	a	a	a	b	a	a	b	a	a	a	a	a	b	a	a	b	a
24	19	urban	female	b	a	b	b	a	a	a	a	b	b	a	b	b	a	b	b	a	a	a	a	b	b	a	b	b	a	b	b	a	a	a	a	b	b	a	b	b	a	b	b	a	a	a	a	b	b
25	19	urban	male	b	a	b	a	a	a	a	a	b	a	a	a	b	b	a	a	a	a	a	a	a	a	a	b	b	a	a	b	a	a	a	a	a	a	a	a	b	a	b	a	a	a	a	a	a	a
26	19	urban	male	b	a	b	b	a	a	a	a	b	a	a	b	b	a	b	b	a	a	a	a	b	b	a	b	b	a	a	b	a	a	a	a	a	a	a	b	b	a	a	b	a	a	a	a	a	a
27	18	urban	male	b	a	a	b	a	a	a	a	b	b	a	b	b	a	a	b	a	a	a	a	b	a	a	b	b	a	a	b	a	a	a	a	b	a	a	b	b	a	b	b	a	a	a	a	b	a
28	15	urban	male	b	a	a	b	a	a	a	a	b	a	a	b	b	a	a	a	a	b	a	a	b	a	a	b	b	a	b	a	a	a	a	a	b	a	a	b	b	a	b	b	a	b	a	a	b	a
29	18	rural	female	a	b	a	a	a	a	a	a	b	a	a	a	a	b	a	b	a	a	a	a	b	a	a	a	a	a	a	b	a	a	a	a	b	a	a	a	b	a	b	a	a	a	a	a	a	a
30	18	rural	female	b	a	a	b	a	a	a	a	b	a	a	b	b	a	a	b	a	a	a	a	b	a	a	b	a	a	a	b	a	a	a	a	b	a	a	a	b	a	a	b	a	a	a	a	b	a
31	18	urban	male	a	a	a	a	a	a	a	a	b	a	a	b	a	a	a	a	a	a	a	a	b	a	a	b	a	a	a	b	a	a	a	a	b	a	a	b	b	a	a	a	a	b	a	a	b	a
32	19	urban	male	b	b	a	b	a	b	b	a	a	a	a	a	a	b	b	b	a	b	a	b	a	a	a	a	a	b	b	b	b	a	b	b	a	a	a	a	b	b	b	a	b	b	b	b	a	b
33	18	rural	male	a	a	a	a	a	b	b	a	b	a	b	b	a	a	b	a	a	b	a	a	b	b	b	b	b	b	a	a	a	a	a	a	b	a	b	b	a	a	b	a	a	a	a	a	b	b
34	18	urban	female	b	a	a	a	a	a	a	a	b	a	b	b	a	a	a	a	a	a	a	a	b	a	a	b	b	a	b	b	a	a	a	a	b	a	a	b	b	a	a	a	a	a	a	a	a	a
35	18	rural	female	b	a	a	b	a	a	a	a	b	a	a	b	b	b	a	b	a	a	a	a	a	a	a	b	b	a	a	a	a	a	a	a	b	a	a	b	a	a	a	b	a	a	a	a	b	a
36	18	rural	female	b	b	a	b	a	a	a	b	a	a	a	a	a	a	a	b	b	a	a	b	a	a	a	a	b	b	a	b	a	a	b	b	a	a	a	a	b	b	a	b	a	a	a	b	a	a
37	18	urban	male	b	a	a	b	a	a	a	a	b	a	a	b	b	a	a	b	a	a	a	a	b	b	a	b	b	a	a	b	a	a	a	a	b	a	a	b	b	a	a	b	a	a	a	a	b	a
38	19	rural	male	b	b	a	a	b	a	b	b	a	a	a	a	a	b	a	b	b	a	b	b	a	a	a	a	a	b	a	a	b	a	b	b	a	a	a	a	a	b	a	a	b	a	a	b	a	a
39	18	urban	female	a	a	a	b	a	a	a	a	b	a	a	b	b	a	a	a	a	a	a	a	b	a	a	b	b	a	a	b	a	a	a	a	b	a	a	a	a	a	a	b	a	a	a	a	b	a
40	20	rural	male	a	a	a	b	a	a	b	a	a	a	a	a	b	a	a	a	a	a	b	b	b	a	a	a	b	b	a	a	a	a	b	a	a	a	a	a	b	a	b	b	a	a	a	a	a	a
41	17	rural	female	b	b	a	a	b	b	b	b	a	b	b	a	a	a	b	a	b	b	b	b	a	b	b	b	a	b	a	b	b	a	b	a	b	a	a	a	b	a	b	b	b	b	b	a	b	a
42	19	urban	male	b	a	a	b	a	a	a	a	b	a	a	b	b	a	a	b	a	a	a	a	b	a	a	b	b	a	a	b	a	a	a	a	b	a	a	b	b	a	a	b	a	a	a	a	b	a
43	18	rural	male	a	b	a	a	a	a	b	b	b	a	a	a	b	b	a	b	b	a	b	b	a	b	a	a	a	a	b	b	b	a	a	a	a	a	a	a	a	a	a	a	b	b	b	a	b	a
44	19	rural	male	b	a	a	b	a	a	a	a	b	a	a	b	b	a	a	b	a	b	a	a	b	b	a	b	b	a	b	b	a	a	a	a	b	a	a	b	b	a	a	b	a	a	a	a	b	a
45	17	rural	female	b	a	a	a	a	a	a	a	b	a	a	b	b	a	a	b	a	a	a	a	b	a	a	b	b	a	a	a	a	a	a	a	b	a	a	b	b	a	a	b	a	a	a	a	b	a
46	18	urban	male	a	a	a	a	a	a	a	a	b	a	a	b	a	a	a	a	a	a	a	a	b	a	a	b	a	a	a	b	a	a	a	a	b	a	a	b	a	a	a	a	a	a	a	a	b	a
47	17	urban	female	b	b	b	b	a	a	b	b	a	b	a	a	b	a	a	b	a	b	a	a	b	b	a	a	b	b	b	b	a	a	a	a	b	b	a	a	b	b	a	b	a	a	b	a	b	b
48	18	rural	female	a	a	a	a	a	a	a	a	a	a	a	b	a	a	a	a	a	b	a	b	a	a	a	a	a	a	a	b	a	b	a	a	b	a	a	a	b	b	a	a	a	b	a	a	b	a
49	17	urban	female	b	a	a	a	a	a	a	a	b	a	a	b	b	a	a	b	a	a	a	a	b	a	a	b	b	a	a	b	a	a	a	a	b	a	a	b	b	a	a	b	a	a	a	a	b	a
50	17	rural	male	a	a	a	b	a	a	a	a	b	a	a	b	b	a	b	b	a	a	a	a	b	a	a	b	b	a	a	a	a	a	a	a	a	b	a	b	b	a	a	b	a	a	a	a	b	b
51	19	urban	male	b	b	a	b	a	a	b	a	a	a	a	a	b	a	a	b	a	a	b	a	a	a	a	a	b	b	a	b	a	a	a	a	a	a	a	a	b	b	a	b	a	a	b	a	a	b
52	18	urban	male	a	b	b	b	b	b	b	b	a	a	b	a	b	b	a	a	b	b	b	b	a	a	b	a	a	a	a	a	b	b	b	b	a	a	a	a	a	b	b	a	b	a	b	b	a	b
53	18	rural	male	a	a	a	a	a	a	a	a	a	a	a	a	a	a	a	a	a	a	a	a	a	a	a	a	b	a	a	b	a	a	a	a	a	a	a	a	b	a	a	a	a	a	a	a	a	a
54	18	urban	male	a	a	a	b	a	a	a	a	b	a	a	b	b	a	a	b	a	a	a	a	b	a	a	b	a	a	a	a	a	a	a	a	b	a	a	b	a	a	a	b	a	a	a	a	b	a
55	18	urban	male	a	a	a	a	a	a	a	a	b	a	a	b	a	a	a	a	a	a	a	a	b	a	a	b	a	a	a	a	a	a	a	a	b	a	a	b	a	a	a	a	a	b	a	a	b	a
56	18	urban	female	a	a	a	a	a	a	a	a	b	a	a	b	b	a	a	b	a	a	a	a	b	a	a	a	b	a	a	b	a	a	a	a	b	a	a	b	b	a	a	b	a	a	a	a	b	a
57	18	urban	male	b	a	a	b	a	a	a	a	b	a	a	b	b	a	a	b	a	a	a	a	b	a	a	b	b	a	a	b	a	a	a	a	b	a	a	b	b	a	a	b	a	a	a	a	b	b
58	18	rural	male	b	a	a	b	a	a	a	a	b	a	a	b	b	a	a	b	a	a	a	a	b	a	a	b	a	a	a	a	a	a	a	a	b	a	a	b	b	a	a	a	a	a	a	a	b	a
59	19	urban	male	a	a	a	b	a	a	a	a	a	a	a	b	b	a	a	b	a	a	a	a	a	a	a	b	a	a	a	a	a	a	a	a	a	a	a	a	a	a	a	a	a	a	a	a	a	a
60	18	urban	female	b	a	a	b	a	a	b	b	a	a	a	a	a	b	a	b	b	a	b	b	a	a	a	a	b	b	a	b	b	a	b	a	a	a	a	a	b	b	a	b	b	a	a	a	a	a
61	19	rural	male	b	b	a	a	b	a	b	b	a	a	a	a	a	a	a	b	b	b	a	b	a	b	a	a	a	a	a	a	a	a	a	a	b	a	a	a	a	a	a	a	a	a	b	a	a	a
62	18	urban	female	a	b	a	a	a	a	b	b	a	a	a	a	a	b	a	a	a	b	b	b	a	a	a	a	a	a	a	a	b	a	a	b	a	a	a	a	b	a	a	a	b	a	b	b	a	a
63	20	rural	female	b	a	a	b	a	a	a	a	a	a	a	a	b	a	a	b	a	a	a	a	a	a	a	a	b	a	a	b	a	a	a	a	a	a	a	a	b	a	a	b	a	a	a	a	b	a
64				28	48	51	26	56	53	44	51	23	56	53	27	23	51	50	23	53	48	50	50	24	51	56	23	26	52	52	21	55	57	52	56	27	54	58	30	19	50	49	28	56	49	49	54	24	48
[truncated: 50 more columns]

## Sheet: frequency
	a-a1a2	a-a1a3	a-a1a4	a-a2a3	a-a2a4	a-a3a4	b-b1b2	b-b1b3	b-b1b4	b-b2b3	b-b2b4	b-b3b4	c-c1c2	c-c1c3	c-c1c4	c-c2c3	c-c2c4	c-c3c4	d-d1d2	d-d1d3	d-d1d4	d-d2d3	d-d2d4	d-d3d4
the frequency of choosing test A	100	193	208	210	210	97	94	203	202	221	213	105	92	200	204	201	203	92	92	185	184	219	208	97
the frequency of choosing test B	152	59	44	42	42	155	158	49	50	31	39	147	160	52	48	51	49	160	160	67	68	33	44	155
